# Supplementary material for: Predictors of Suicide Risk and Mental Health Outcomes among Hong Kong Veterinarians: A Cross-Sectional Study
Source: MDPI journal article supplement (doi:10.3390/bs13090770), 2023-09-15
Supplement: s1 [file s1]

**Manuscript title**

Professional quality of life and mental health among Hong Kong veterinarians: a quantitative pilot study

**Authors names, affiliation, and address**

CHAN, Camille K.Y.<sup>1</sup>

ORCID: 0000-0003-2971-7542

WONG, Paul W.C.<sup>1</sup>

paulw@hku.hk

ORCID: 0000-0003-3388-6285

<sup>1</sup> Department of Social Work and Social Administration, The University of Hong Kong

**Corresponding author**

CHAN, Camille K.Y. (cchanky@hku.hk)

5/F, Department of Social Work and Social Administration, Jockey Club Tower, The

Centennial Campus, The University of Hong Kong, Pokfulam, Hong Kong

(+852) 6683 8563

Supplementary Table S1. Data completion rate

|                             | <b>Participants</b><br>(N=56) |
|-----------------------------|-------------------------------|
| <b>Mental health status</b> |                               |
| PHQ-9 total score           | 51 (91.1)                     |
| GAD-7 total score           | 51 (91.1)                     |
| SBQ-R total score           | 50 (89.3)                     |
| <b>ProQOL</b>               |                               |
| CS score                    | 56 (100.0)                    |
| BO score                    | 56 (100.0)                    |
| STS score                   | 56 (100.0)                    |

Note:

PHQ-9 = Patient Health Questionnaire–9

GAD-7 = Generalised Anxiety Disorder–7

SBQ-R = Suicidal Behaviors Questionnaire-Revised

ProQOL = Professional Quality of Life scale

CS = compassion satisfaction

BO = burnout

STS = secondary traumatic stress

Supplementary Table S2. SBQ-R results.

|                                               |      | Mean (SD)  | Median | IQR       | At risk of suicide<br>(SBQ-R >7) |
|-----------------------------------------------|------|------------|--------|-----------|----------------------------------|
| <b>Total respondents</b>                      | N=50 | 5.8 (3.4)  | 5.0    | 3.0-7.0   | 11 (22.0)                        |
| <b>Lifetime suicide-risk ideation</b>         |      |            |        |           |                                  |
| Non-Risk / Non-Suicidal                       | n=25 | 3.6 (1.0)  | 3.0    | 3.0-5.0   | 0 (0.0)                          |
| Suicide-risk ideation                         |      |            |        |           |                                  |
| Brief passing thought                         | n=17 | 6.2 (2.0)  | 6.0    | 5.0-7.0   | 3 (6.0)                          |
| Suicide plan without intent                   | n=5  | 11.2 (2.4) | 11.0   | 10.0-13.0 | 5 (10.0)                         |
| Suicide plan with intent                      | n=2  | 14.5 (3.5) | 14.5   | 12.0-17.0 | 2 (4.0)                          |
| Suicide attempt without intent                | n=1  | 8 (NA)     | NA     | NA        | 1 (2.0)                          |
| <b>Past 12 months suicide ideation</b>        |      |            |        |           |                                  |
| Never                                         | n=33 | 3.9 (1.2)  | 3.0    | 3.0-5.0   | 0 (0.0)                          |
| Once                                          | n=8  | 7.6 (2.1)  | 7.5    | 6.0-9.0   | 4 (8.0)                          |
| Twice                                         | n=4  | 7.8 (1.7)  | 7.5    | 6.5-9.0   | 2 (4.0)                          |
| 3-4 times                                     | n=2  | 12.0 (1.4) | 12.0   | 11.0-13.0 | 2 (4.0)                          |
| 5 times or more                               | n=3  | 14.3 (2.5) | 14.0   | 13.0-15.5 | 3 (6.0)                          |
| <b>DISCLOSURE OF POSSIBLE SUICIDE ATTEMPT</b> |      |            |        |           |                                  |
| No                                            | n=41 | 4.6 (2.0)  | 4.0    | 3.0-6.0   | 4 (8.0)                          |
| Once, without suicide intent                  | n=4  | 8.3 (2.1)  | 8.5    | 6.5-10.0  | 2 (4.0)                          |
| More than once, without suicide intent        | n=4  | 12.3 (1.5) | 12.0   | 11.0-13.5 | 4 (8.0)                          |
| More than once, with suicide intent           | n=1  | 21 (NA)    | NA     | NA        | 1 (2.0)                          |
| <b>LIKELIHOOD OF SUICIDE IN THE FUTURE</b>    |      |            |        |           |                                  |
| Never / No chance                             | n=33 | 4.0 (1.3)  | 3.0    | 3.0-5.0   | 1 (2.0)                          |
| Rather unlikely                               | n=9  | 7.0 (1.9)  | 7.0    | 6.0-8.0   | 3 (6.0)                          |
| Unlikely                                      | n=7  | 10.9 (2.6) | 11.0   | 10.0-12.5 | 6 (12.0)                         |
| Likely                                        | n=0  | NA         | NA     | NA        | NA                               |
| Very likely                                   | n=1  | 21 (NA)    | NA     | NA        | 1 (2.0)                          |
| <b>SUICIDE RISKS</b>                          |      |            |        |           |                                  |
| Not at-risk of suicide                        | n=39 | 4.3 (1.4)  | 4.0    | 3.0-5.0   | 39 (78.0)                        |
| At-risk of suicide                            | n=11 | 11.1 (2.8) | 11.0   | 9.0-12.5  | 11 (22.0)                        |

<sup>a</sup> Percentage based on valid sample. IQR – Tukey’s Hinges interquartile range. SD – standard deviation. N – Total number of respondents. n – Number of respondents in the sub-group. SBQ-R – Suicidal Behaviours Questionnaire-Revised

Supplementary Table S3. Cross-tabulations of ProQOL and mental health.

|                                  | BURNOUT |    |     |          |      | STS |          |      | CS  |          |      |
|----------------------------------|---------|----|-----|----------|------|-----|----------|------|-----|----------|------|
|                                  | N       | n  | Low | Moderate | High | Low | Moderate | High | Low | Moderate | High |
| <b>All participants</b>          | 56      | 56 | 13  | 41       | 2    | 19  | 37       | 0    | 2   | 43       | 11   |
| <b>At-risk of suicide</b>        | 50      | 11 | 1   | 10       | 0    | 1   | 10       | 0    | 0   | 11       | 0    |
| <b>Current suicidal ideation</b> | 51      | 10 | 0   | 9        | 1    | 1   | 9        | 0    | 0   | 10       | 0    |
| <b>Depressed</b>                 | 56      | 15 | 0   | 14       | 1    | 0   | 15       | 0    | 0   | 15       | 0    |
| <b>Anxious</b>                   | 56      | 15 | 0   | 14       | 1    | 1   | 14       | 0    | 0   | 14       | 1    |

N – Total number of respondents. n – Number of respondents in the sub-group.

Supplementary Questionnaire S1. Questionnaire

**Mental health of veterinarians in Hong Kong**

**Consent:**

|                                                                                                                                                            |          |
|------------------------------------------------------------------------------------------------------------------------------------------------------------|----------|
| I understand the procedures described above and agree to participate in this study.                                                                        | checkbox |
| I understand the data collected <u>cannot</u> be withdrawn once provided due to unfeasibility to link anonymity data collected to individual participants. | checkbox |

**Screenener**

**S1. Are you a veterinary profession who are registered with the Veterinary Surgeon Board of Hong Kong?**

|     |              |                  |
|-----|--------------|------------------|
| Yes | Radio button | Continue         |
| No  | Radio button | <b>Terminate</b> |

**S2. Which of the below best describes your registration listed in the Veterinary Surgeon Board of Hong Kong?**

|                                  |              |                  |
|----------------------------------|--------------|------------------|
| Veterinarian                     | Radio button | Continue         |
| Veterinary Surgeon / Specialists | Radio button | Continue         |
| Others (Please specify)          | Textbox      | Continue         |
| Refused                          | Radio button | <b>Terminate</b> |

**S3. Are you currently practicing in Hong Kong?**

|     |              |                  |
|-----|--------------|------------------|
| Yes | Radio button | Continue         |
| No  | Radio button | <b>Terminate</b> |

**Main Questionnaire**

**Section A: We would like to start with understanding your practice background.**

**A1. What best describes your medical specialty?**

|                                   |              |
|-----------------------------------|--------------|
| Veterinarian (Cats and/or dogs)   | Radio button |
| Veterinary (Small mammals)        | Radio button |
| Veterinary (Reptiles and exotics) | Radio button |
| Lab veterinarian                  | Radio button |
| Equine veterinarian               | Radio button |
| Zoologic veterinarian             | Radio button |
| Farm veterinarian                 | Radio button |
| Others (Please specify)           | Textbox      |
| Refuse                            | Radio button |

**A2. When did you receive your earliest qualification as a veterinarian?**

|                             |              |
|-----------------------------|--------------|
| Less than 2 years ago       | Radio button |
| 2 to less 5 years ago       | Radio button |
| 5 to less than 8 years ago  | Radio button |
| 8 to less than 12 years ago | Radio button |

|                              |              |
|------------------------------|--------------|
| 12 to less than 16 years ago | Radio button |
| 16 to less than 20 years ago | Radio button |
| 20 to less than 25 years ago | Radio button |
| More than 25 years           | Radio button |
| Refuse                       | Radio button |

**A3a. Have you practiced in locations other than Hong Kong (please exclude your residency)?**

|     |              |
|-----|--------------|
| Yes | Radio button |
| No  | Radio button |

**A3b. How many years in total have you practiced in locations other than Hong Kong?**

|                         |              |
|-------------------------|--------------|
| Less than 4 years       | Radio button |
| 4 to less than 10 years | Radio button |
| More than 10 years      | Radio button |

**A4. Do you require translation help when consulting Cantonese speaking clients?**

|     |              |
|-----|--------------|
| Yes | Radio button |
| No  | Radio button |

**A5. Which of the following best describe your employment status?**

|                         |              |
|-------------------------|--------------|
| Full time               | Radio button |
| Part time / Locum       | Radio button |
| Others (please specify) | Textbox      |

**A6. Which of the following best describe your work hours?**

|                                              |              |
|----------------------------------------------|--------------|
| Mostly between 08:00-20:00                   | Radio button |
| Mostly between 20:01-07:59                   | Radio button |
| A combination of day-shifts and night-shifts | Radio button |
| Others (please specify)                      | Textbox      |

**A7. Which of the following best describe your seniority?**

|                                                    |              |
|----------------------------------------------------|--------------|
| Clinic Owner/ Partner                              | Radio button |
| (Non-owner) Managerial level / Key decision makers | Radio button |
| Employee                                           | Radio button |
| Intern                                             | Radio button |
| Others (please specify)                            | Textbox      |

**A8a. Which of the below best describe your workplace?**

|                                                          |              |
|----------------------------------------------------------|--------------|
| Single owner or partnership veterinary clinic / hospital | Radio button |
| Chained/Group veterinary clinic / hospital               | Radio button |
| Non-government organisation                              | Radio button |
| Academic research                                        | Radio button |
| Government and/or government laboratories                | Radio button |
| Private laboratories                                     | Radio button |
| Others (please specify)                                  | Textbox      |

|        |    |
|--------|----|
| Refuse | 98 |
|--------|----|

**A8b. Which of the following best describe your clinic role?**

|                                                   |              |
|---------------------------------------------------|--------------|
| General Practice                                  | Radio button |
| Emergency Medicine                                | Radio button |
| Specialist Services                               | Radio button |
| Physiotherapy                                     | Radio button |
| Traditional Chinese Medicine (TCM) or Acupuncture | Radio button |
| Non-TCM herbal therapy, homeopathy, or reiki      | Radio button |
| Other (Please specify)                            | Textbox      |
| Refuse                                            | 98           |

**A8c. On average, how many hours per week would you be the sole charge of the clinic and in isolation as a vet in your workplace?**

|                                                |              |
|------------------------------------------------|--------------|
| I'm never the only vet on duty in my workplace | Radio button |
| Less than 8 hours per week                     | Radio button |
| 8 to less than 16 hours per week               | Radio button |
| 16 to less than 25 hours per week              | Radio button |
| More than 25 hours per week                    | Radio button |
| I'm always the only vet on duty                | Radio button |

**Q8d. How many hours do you work in an average week?**

|         |
|---------|
| Numeric |
|---------|

**A9. Which of the below best describe the owner(s) of your workplace?**

|                                                    |              |
|----------------------------------------------------|--------------|
| Owned by the government corporate                  | Radio button |
| Owned by corporate or business investors           | Radio button |
| Owned by veterinarians                             | Radio button |
| Owned by both business investors and veterinarians | Radio button |
| Others (please specify)                            | Textbox      |
| Refuse                                             | Radio button |

**A10. In the past 6 months, which district did you spend most of your time practicing?**

|                     |              |
|---------------------|--------------|
| Hong Kong Island    |              |
| Central and Western | Radio button |
| Eastern             | Radio button |
| Southern            | Radio button |
| Wan Chai            | Radio button |
| Kowloon             |              |
| Kowloon City        | Radio button |
| Kwun Tong           | Radio button |
| Sham Shui Po        | Radio button |
| Yau Tsim Mong       | Radio button |
| Wong Tai Sin        | Radio button |

|                  |              |
|------------------|--------------|
| New Territories  |              |
| Kwai Tsing       | Radio button |
| North            | Radio button |
| Outlying Islands | Radio button |
| Sai Kung         | Radio button |
| Sha Tin          | Radio button |
| Tai Po           | Radio button |
| Tsuen Wan        | Radio button |
| Tuen Mun         | Radio button |
| Yuen Long        | Radio button |
| Refuse           | Radio button |

**A11. What forms of official complaint(s) have you ever received from clients?**

|                                                                                  |              |
|----------------------------------------------------------------------------------|--------------|
| Complaints made to the Veterinary Surgeon Board of Hong Kong                     | Radio button |
| Complaints made to the Agriculture, Fisheries and Conservation Department (AFCD) | Radio button |
| Complaints made to the Consumer Council                                          | Radio button |
| Other forms of legal proceedings                                                 | Radio button |
| None                                                                             | Radio button |
| Refuse                                                                           | Radio button |

**A12. Are you covered by professional indemnity insurance in your workplace?**

|          |              |
|----------|--------------|
| Yes      | Radio button |
| No       | Radio button |
| Not sure | Radio button |

**Section Ba: Demand-Control-Support Questionnaire (DCSQ)**

|                   |          |       |                |
|-------------------|----------|-------|----------------|
| 1                 | 2        | 3     | 4              |
| Strongly disagree | Disagree | Agree | Strongly agree |

|                                                                                    | 1 | 2 | 3 | 4 |
|------------------------------------------------------------------------------------|---|---|---|---|
| Bi1. Do you have to perform your work tasks quickly?                               |   |   |   |   |
| Bi2. Do you have to work intensely? (In other words, produce a lot in little time) |   |   |   |   |
| Bi3. Does your work require too much from you?                                     |   |   |   |   |
| Bi4. Do you have enough time to perform all the tasks of your job?                 |   |   |   |   |
| Bi5. Does your work usually involve contradictory or discordant requirements?      |   |   |   |   |
| Bii1. Is it possible for you to learn new things through your work?                |   |   |   |   |
| Bii2. Does your work require much ability or specialized knowledge?                |   |   |   |   |
| Bii3. Does your work require you to show initiative?                               |   |   |   |   |
| Bii4. In your job, do you have to repeat the same tasks many times?                |   |   |   |   |
| Bii5. Can you choose HOW to do your job?                                           |   |   |   |   |
| Bii6. Can you choose WHAT to do in your job?                                       |   |   |   |   |
| Biii1. Is there a calm and pleasant environment where you work?                    |   |   |   |   |
| Biii2. At work, do you have a good relationship with each other?                   |   |   |   |   |



|                                                                            |  |  |  |  |
|----------------------------------------------------------------------------|--|--|--|--|
| Biii3. Can you rely on the support of your coworkers?                      |  |  |  |  |
| Biii4. If you are not having a good day, do your coworkers understand you? |  |  |  |  |
| Biii5. At work, do you have a good relationship with your superiors?       |  |  |  |  |
| Biii6. Do you like to work with your coworkers?                            |  |  |  |  |

### Section Bb: Workplace and career

| 1                 | 2        | 3                          | 4     | 5              |
|-------------------|----------|----------------------------|-------|----------------|
| Strongly Disagree | Disagree | Neither agree nor disagree | Agree | Strongly Agree |

To what extent would you agree statements below?

|                                                                                       | 1 | 2 | 3 | 4 | 5 |
|---------------------------------------------------------------------------------------|---|---|---|---|---|
| B1. Veterinary medicine is a good career choice.                                      |   |   |   |   |   |
| B2. There is excessive administrative duties and managerial aspects working as a vet. |   |   |   |   |   |

### Section C: Professional Quality of Life Scale (ProQOL)

When you *help* people and animals, you have direct contact with their lives. As you may have found, your compassion for those you *help* can affect you in positive and negative ways. Below are some questions about your experiences, both positive and negative, as a *veterinarian*. Consider each of the following questions about you and your current work situation. Select the number that honestly reflects how frequently you experienced these things in the last 30 days.

| 1     | 2      | 3         | 4     | 5          |
|-------|--------|-----------|-------|------------|
| Never | Rarely | Sometimes | Often | Very often |

In the last 30 days...

|                                                                                                                                             | 1 | 2 | 3 | 4 | 5 |
|---------------------------------------------------------------------------------------------------------------------------------------------|---|---|---|---|---|
| C1. I am happy.                                                                                                                             |   |   |   |   |   |
| C2. I am preoccupied with more than one client and/or patient I help.                                                                       |   |   |   |   |   |
| C3. I get satisfaction from being able to provide care for others.                                                                          |   |   |   |   |   |
| C4. I feel connected to others.                                                                                                             |   |   |   |   |   |
| C5. I jump or am startled by unexpected sounds.                                                                                             |   |   |   |   |   |
| C6. I feel invigorated after working with those I provide care for.                                                                         |   |   |   |   |   |
| C7. I find it difficult to separate my personal life from my life as a veterinarian.                                                        |   |   |   |   |   |
| C8. I am not as productive at work because I am losing sleep over traumatic experiences of a client and/or patient that I provide care for. |   |   |   |   |   |
| C9. I think that I might have been affected by the traumatic stress of those I provide care for.                                            |   |   |   |   |   |
| C10. I feel trapped by my job as a veterinarian.                                                                                            |   |   |   |   |   |
| C11. Because of my role as a veterinarian, I have felt "on edge" about various things.                                                      |   |   |   |   |   |
| C12. I like my work as a veterinarian.                                                                                                      |   |   |   |   |   |
| C13. I feel depressed because of the traumatic experiences of the client                                                                    |   |   |   |   |   |

|                                                                                                                                      |  |  |  |  |  |
|--------------------------------------------------------------------------------------------------------------------------------------|--|--|--|--|--|
| and/or patient I provide care for.                                                                                                   |  |  |  |  |  |
| C14. I feel as though I am experiencing the trauma of client and/or patient I have provide care for.                                 |  |  |  |  |  |
| C15. I have beliefs that sustain me.                                                                                                 |  |  |  |  |  |
| C16. I am pleased with how I am able to keep up with veterinary techniques and protocols.                                            |  |  |  |  |  |
| C17. I am the person I always wanted to be.                                                                                          |  |  |  |  |  |
| C18. My work makes me feel satisfied.                                                                                                |  |  |  |  |  |
| C19. I feel worn out because of my work as a veterinarian.                                                                           |  |  |  |  |  |
| C20. I have happy thoughts and feelings about those I provide care for and how I could help them.                                    |  |  |  |  |  |
| C21. I feel overwhelmed because my case workload seems endless.                                                                      |  |  |  |  |  |
| C22. I believe I can make a difference through my work.                                                                              |  |  |  |  |  |
| C23. I avoid certain activities or situations because they remind me of frightening experiences of the client and/or patient I help. |  |  |  |  |  |
| C24. I am proud of what I can do to provide care for.                                                                                |  |  |  |  |  |
| C25. As a result of my care, I have intrusive, frightening thoughts.                                                                 |  |  |  |  |  |
| C26. I feel “bogged down” by the system.                                                                                             |  |  |  |  |  |
| C27. I have thoughts that I am a “success” as a veterinarian.                                                                        |  |  |  |  |  |
| C28. I can’t recall important parts of my work with trauma victims.                                                                  |  |  |  |  |  |
| C29. I am a very caring person.                                                                                                      |  |  |  |  |  |
| C30. I am happy that I chose to do this work.                                                                                        |  |  |  |  |  |

**NEXT PAGE; ASK ALL**

#### **Section D: Self-compassion Scale (SCS)**

##### ***HOW I TYPICALLY ACT TOWARDS MYSELF IN DIFFICULT TIMES***

Please read each statement carefully before answering.

To the left of each item, indicate how often you behave in the stated manner, using the following scale:

|              |   |   |   |               |
|--------------|---|---|---|---------------|
| 1            | 2 | 3 | 4 | 5             |
| Almost never |   |   |   | Almost always |

|                                                                                                                        | 1 | 2 | 3 | 4 | 5 |
|------------------------------------------------------------------------------------------------------------------------|---|---|---|---|---|
| D1. I’m disapproving and judgmental about my own flaws and inadequacies.                                               |   |   |   |   |   |
| D2. When I’m feeling down, I tend to obsess and fixate on everything that’s wrong.                                     |   |   |   |   |   |
| D3. When things are going badly for me, I see the difficulties as part of life that everyone goes through.             |   |   |   |   |   |
| D4. When I think about my inadequacies, it tends to make me feel more separate and cut off from the rest of the world. |   |   |   |   |   |
| D5. I try to be loving towards myself when I’m feeling emotional pain.                                                 |   |   |   |   |   |
| D6. When I fail at something important to me, I become consumed by feelings of inadequacy.                             |   |   |   |   |   |
| D7. When I’m down and out, I remind myself that there are lots of other people in the world feeling like I am.         |   |   |   |   |   |
| D8. When times are really difficult, I tend to be tough on myself.                                                     |   |   |   |   |   |

|                                                                                                                        |  |  |  |  |  |
|------------------------------------------------------------------------------------------------------------------------|--|--|--|--|--|
| D9. When something upsets me, I try to keep my emotions in balance.                                                    |  |  |  |  |  |
| D10. When I feel inadequate in some way, I try to remind myself that feelings of inadequacy are shared by most people. |  |  |  |  |  |
| D11. I'm intolerant and impatient towards those aspects of my personality I don't like.                                |  |  |  |  |  |
| D12. When I'm going through a very hard time, I give myself the caring and tenderness I need.                          |  |  |  |  |  |
| D13. When I'm feeling down, I tend to feel like most other people are probably happier than I am.                      |  |  |  |  |  |
| D14. When something painful happens, I try to take a balanced view of the situation.                                   |  |  |  |  |  |
| D15. I try to see my failings as part of the human condition.                                                          |  |  |  |  |  |
| D16. When I see aspects of myself that I don't like, I get down on myself.                                             |  |  |  |  |  |
| D17. When I fail at something important to me, I try to keep things in perspective.                                    |  |  |  |  |  |
| D18. When I'm really struggling, I tend to feel like other people must be having an easier time of it.                 |  |  |  |  |  |
| D19. I'm kind to myself when I'm experiencing suffering.                                                               |  |  |  |  |  |
| D20. When something upsets me, I get carried away with my feelings.                                                    |  |  |  |  |  |
| D21. I can be a bit cold-hearted towards myself when I'm experiencing suffering.                                       |  |  |  |  |  |
| D22. When I'm feeling down, I try to approach my feelings with curiosity and openness.                                 |  |  |  |  |  |
| D23. I'm tolerant of my own flaws and inadequacies.                                                                    |  |  |  |  |  |
| D24. When something painful happens, I tend to blow the incident out of proportion.                                    |  |  |  |  |  |
| D25. When I fail at something that's important to me, I tend to feel alone in my failure.                              |  |  |  |  |  |
| D26. I try to be understanding and patient towards those aspects of my personality I don't like.                       |  |  |  |  |  |

### Section E: Euthanasia Distress Scale (EDS)

| 1                 | 2        | 3       | 4     | 5              |
|-------------------|----------|---------|-------|----------------|
| Strongly disagree | Disagree | Neutral | Agree | Strongly agree |

|                                                                                                                                | 1 | 2 | 3 | 4 | 5 |
|--------------------------------------------------------------------------------------------------------------------------------|---|---|---|---|---|
| E1. It is difficult to hide one's emotions when performing euthanasia on a laboratory or livestock animal.                     |   |   |   |   |   |
| E2. Performing euthanasia is emotionally draining.                                                                             |   |   |   |   |   |
| E3. Thinking about performing euthanasia makes me anxious.                                                                     |   |   |   |   |   |
| E4. It would be emotionally difficult for me to euthanize an animal who has severe behavior problems but is otherwise healthy. |   |   |   |   |   |
| E5. It would be emotionally difficult for me to euthanize an animal who has difficulty walking.                                |   |   |   |   |   |
| E6. It would be emotionally difficult for me to euthanize an animal to help control the population in an animal shelter.       |   |   |   |   |   |

|                                                                                                     |  |  |  |  |  |
|-----------------------------------------------------------------------------------------------------|--|--|--|--|--|
| E7. The physical act of performing the euthanasia is disturbing to me (e.g., administering the IV). |  |  |  |  |  |
| E8. It would bother me if an animal I were euthanizing vocalized when I administered the IV.        |  |  |  |  |  |

### Section F: The Entrapment Short-Form Scale (E-SF)

You will now be shown some more statements about thoughts and feelings. Please read each and indicate how much it applies to you.

| 0                  | 1                    | 2                  | 3                   | 4                 |
|--------------------|----------------------|--------------------|---------------------|-------------------|
| Not at all like me | A little bit like me | Moderately like me | Quite a bit like me | Extremely like me |

|                                                                  | 0 | 1 | 2 | 3 | 4 |
|------------------------------------------------------------------|---|---|---|---|---|
| F1. I often have the feeling that I would just like to run away. |   |   |   |   |   |
| F2. I feel powerless to change things.                           |   |   |   |   |   |
| F3. I feel trapped inside myself.                                |   |   |   |   |   |
| F4. I feel I'm in a deep hole I can't get out of.                |   |   |   |   |   |

### Section G: Fearlessness of death of the veterinary profession

| 1                 | 2        | 3       | 4     | 5              |
|-------------------|----------|---------|-------|----------------|
| Strongly disagree | Disagree | Neutral | Agree | Strongly agree |

|                                                                                                      | 1 | 2 | 3 | 4 | 5 |
|------------------------------------------------------------------------------------------------------|---|---|---|---|---|
| G1. I value longevity of human life more than the quality of living.                                 |   |   |   |   |   |
| G2. My involvement in animal euthanasia acquired my concept of human's life and death.               |   |   |   |   |   |
| G3. My frequent encounter of open wounds and animal corpse had made me less anxious of death.        |   |   |   |   |   |
| G4. My involvement with animal euthanasia acquired my concept of taking one's own life.              |   |   |   |   |   |
| G5. Any form of suicide is morally wrong.                                                            |   |   |   |   |   |
| G6. I am not at all afraid to die if I knew it won't be painful.                                     |   |   |   |   |   |
| G7. I worry about my family, my friends, and my pets who depends upon me.                            |   |   |   |   |   |
| G8. I would recommend euthanasia for my clients when their pets were experiencing unbearable suffer. |   |   |   |   |   |
| G9. I don't get stressed when performing euthanasia on animals.                                      |   |   |   |   |   |
| G10. I would not want people to think I cannot cope my life.                                         |   |   |   |   |   |
| G11. I would rather end my life if I happened to experience unbearable suffer.                       |   |   |   |   |   |

### Section H: Patient Health Questionnaire 9 (PHQ-9)

Over the **last 2 weeks**, how often have you been bothered by any of the following problems?

| 0 | 1 | 2 | 3 |
|---|---|---|---|
|---|---|---|---|

|            |              |                         |                  |
|------------|--------------|-------------------------|------------------|
| Not at all | Several days | More than half the days | Nearly every day |
|------------|--------------|-------------------------|------------------|

|                                                                                                                                                                             | 0 | 1 | 2 | 3 |
|-----------------------------------------------------------------------------------------------------------------------------------------------------------------------------|---|---|---|---|
| H1. Little interest or pleasure in doing things.                                                                                                                            |   |   |   |   |
| H2. Feeling down, depressed, or hopeless.                                                                                                                                   |   |   |   |   |
| H3. Trouble falling or staying asleep, or sleeping too much.                                                                                                                |   |   |   |   |
| H4. Feeling tired or having little energy.                                                                                                                                  |   |   |   |   |
| H5. Poor appetite or overeating.                                                                                                                                            |   |   |   |   |
| H6. Feeling bad about yourself or that you are a failure or have let yourself or your family down.                                                                          |   |   |   |   |
| H7. Trouble concentrating on things, such as reading the newspaper or watching television.                                                                                  |   |   |   |   |
| H8. Moving or speaking so slowly that other people could have noticed. Or the opposite being so fidgety or restless that you have been moving around a lot more than usual. |   |   |   |   |
| H9. Thoughts that you (I) would be better off dead, or of hurting (my)yourself.                                                                                             |   |   |   |   |

### Section I: Generalized Anxiety Disorder Screener (GAD-7)

Over the **last 2 weeks**, how often have you been bothered by the following problems?

|            |              |                         |                  |
|------------|--------------|-------------------------|------------------|
| 1          | 2            | 3                       | 4                |
| Not at all | Several Days | More than half the days | Nearly every day |

|                                                        | 0 | 1 | 2 | 3 |
|--------------------------------------------------------|---|---|---|---|
| I1. Feeling nervous, anxious or on edge.               |   |   |   |   |
| I2. Not being able to stop or control worrying.        |   |   |   |   |
| I3. Worrying too much about different things.          |   |   |   |   |
| I4. Trouble relaxing.                                  |   |   |   |   |
| I5. Being so restless that it is hard to sit still.    |   |   |   |   |
| I6. Becoming easily annoyed or irritated.              |   |   |   |   |
| I7. Feeling afraid as if something awful might happen. |   |   |   |   |

**I8. If you checked off any problems, how difficult have these problems made it for you to do your work, take care of things at home, or get along with other people?**

|                      |              |
|----------------------|--------------|
| Not difficult at all | Radio button |
| Somewhat difficult   | Radio button |
| Very difficult       | Radio button |
| Extremely difficult  | Radio button |

### Section J: Suicide Behaviors Questionnaire – Revised (SBQ-R)

**J1. Have you ever thought about or attempted to kill yourself?**

|                                                                         |              |
|-------------------------------------------------------------------------|--------------|
| Never                                                                   | Radio button |
| It was just a brief passing thought                                     | Radio button |
| I have had a plan at least once to kill myself but did not try to do it | Radio button |
| I have had a plan at least once to kill myself and really wanted to die | Radio button |

|                                                          |              |
|----------------------------------------------------------|--------------|
| I have attempted to kill myself, but did not want to die | Radio button |
| I have attempted to kill myself, and really hoped to die | Radio button |

**J2. How often have you thought about killing yourself in the past year?**

|                              |              |
|------------------------------|--------------|
| Never                        | Radio button |
| Rarely (1 time)              | Radio button |
| Sometimes (2 times)          | Radio button |
| Often (3-4 times)            | Radio button |
| Very often (5 or more times) | Radio button |

**J3. Have you ever told someone that you were going to attempt suicide, or that you might do it?**

|                                                  |              |
|--------------------------------------------------|--------------|
| No                                               | Radio button |
| Yes, at one time, but did not really want to die | Radio button |
| Yes, at one time, and really wanted to do it     | Radio button |
| Yes, more than once, but did not want to do it   | Radio button |
| Yes, more than once, and really wanted to do it  | Radio button |

**J4. How likely is it that you will attempt suicide in the future?**

|                  |              |
|------------------|--------------|
| Never            | Radio button |
| No chance at all | Radio button |
| Rather unlikely  | Radio button |
| Unlikely         | Radio button |
| Likely           | Radio button |
| Rather likely    | Radio button |
| Very likely      | Radio button |

**Section K: Cyberbullying**

Please select the appropriate box that best describe your cyberbullying experiences in the past 6 months.

|                                                                                                                                                                                  | Yes | No |
|----------------------------------------------------------------------------------------------------------------------------------------------------------------------------------|-----|----|
| K1. I have been threatened / harassed by pet owner face-to-face, that they would post negative comments of me on social media.                                                   |     |    |
| K2. I have been accused / criticised on social media by pet owner(s) for something untrue regarding veterinary medical services I provided.                                      |     |    |
| K3. I have been threatened / harassed / humiliated by pet owner(s) on social media.                                                                                              |     |    |
| K4. I have been harassed / humiliated which involved unwanted livestreamed / video-recording made public in social media, with regard to veterinary medical services I provided. |     |    |
| K5. Something negative about me had been posted by pet owner(s) in ways that I can be identified.                                                                                |     |    |
| K6. Someone I know in the vet profession have been criticised of on social media for veterinary medical services they might have provided.                                       |     |    |
| K7. Someone I know in the vet profession have been threatened / harassed / humiliated on social media.                                                                           |     |    |

**ASK only if K2 or K3 or K4 or K5 answered YES**

| 1     | 2      | 3         | 4      |
|-------|--------|-----------|--------|
| Never | Rarely | Sometimes | Always |

|                                                                                                                                                                                     | 1 | 2 | 3 | 4 |
|-------------------------------------------------------------------------------------------------------------------------------------------------------------------------------------|---|---|---|---|
| K8. (if K2 or K3 or K4 or K5 code Yes) I worry about my personal safety because of negative comments made about me on social media.                                                 |   |   |   |   |
| K9. (if K2 or K3 or K4 or K5 code Yes) I worry about what my current clients / other pet owners would think of me after having read negative comments of me posted on social media. |   |   |   |   |
| K10. (if K2 or K3 or K4 or K5 code Yes) I worry what other veterinarians think of me after having read negative comments of me posted on social media.                              |   |   |   |   |

### Section L: Macro-environmental changes

Consider the times of the social unrest (since 2019) and the pandemic (before vaccines were available at Feb-2021), to what extent do you agree with the statements below?

| 1                 | 2        | 3                          | 4     | 5              |
|-------------------|----------|----------------------------|-------|----------------|
| Strongly Disagree | Disagree | Neither agree nor disagree | Agree | Strongly Agree |

During the social unrest and the pandemic, I find that...

|                                                                       | 1 | 2 | 3 | 4 | 5 |
|-----------------------------------------------------------------------|---|---|---|---|---|
| L1. Clients were more difficult to deal with.                         |   |   |   |   |   |
| L2. We had more new clients and patients in the clinic.               |   |   |   |   |   |
| L3. There were more cost-related complaints.                          |   |   |   |   |   |
| L4. More clients were prone to euthanise their pets.                  |   |   |   |   |   |
| L5. More clients delayed their pet's regular check-ups.               |   |   |   |   |   |
| L6. My colleagues were more stressed.                                 |   |   |   |   |   |
| L7. We were losing harmony in our workplace.                          |   |   |   |   |   |
| L8. More clients delayed their pet's essential medical check-ups      |   |   |   |   |   |
| L9. We had more cases of non-life-threatening illnesses in our clinic |   |   |   |   |   |
| L10. More clients have spent less on treatment                        |   |   |   |   |   |
| L11. More clients surrender their pets                                |   |   |   |   |   |
| L12. I was more stressed, in general                                  |   |   |   |   |   |
